# Supplementary material for: Reaction of Corroles with Sarcosine and Paraformaldehyde: A New Facet of Corrole Chemistry
Source: MDPI journal article supplement (doi:10.3390/ijms232113581), 2022-11-05
Supplement: s1 [file s1]

# Reaction of corroles with sarcosine and paraformaldehyde: a new facet on corrole chemistry

Joana F. B. Barata <sup>1,2,\*</sup>, Paula S. S. Lacerda <sup>1,2</sup>, Maria Graça P. M. S. Neves <sup>2,\*</sup>, José A. S. Cavaleiro <sup>2</sup>, Catarina I. V. Ramos <sup>2</sup>, Augusto C. Tomé <sup>2</sup>, Paulo E. Abreu <sup>3</sup> and Alberto A. C. C. Pais <sup>3</sup>

1 CESAM, University of Aveiro, 3810-193 Aveiro, Portugal

2 LAQV-REQUIMTE, Department of Chemistry, University of Aveiro, 3810-193 Aveiro, Portugal

3 Department of Chemistry, University of Coimbra, 3004-535 Coimbra, Portugal

\* Correspondence: jbarata@ua.pt (J.F.B.B.); gneves@ua.pt (M.G.M.P.S.N.)

## Contents

### 1. NMR spectra of compound 4 and compound 5

Figure S1 - <sup>1</sup>H NMR spectrum of compound **4** in CDCl<sub>3</sub> + pyridine-*d*<sub>5</sub>.

Figure S2 – Partial COSY (<sup>1</sup>H/<sup>1</sup>H) spectrum of compound **4** in CDCl<sub>3</sub> + pyridine-*d*<sub>5</sub>.

Figure S3 – NOESY (<sup>1</sup>H/<sup>1</sup>H) spectrum of compound **4** in CDCl<sub>3</sub> + pyridine-*d*<sub>5</sub>.

Figure S4 – HSQC (<sup>1</sup>H/<sup>13</sup>C) spectrum of compound **4** in CDCl<sub>3</sub> + pyridine-*d*<sub>5</sub>.

Figure S5 - HMBC (<sup>1</sup>H/<sup>13</sup>C) spectrum of compound **4** in CDCl<sub>3</sub> + pyridine-*d*<sub>5</sub>.

Figure S6 - <sup>1</sup>H NMR spectrum of compound **5** in CDCl<sub>3</sub> + pyridine-*d*<sub>5</sub>.

Figure S7 – Partial COSY (<sup>1</sup>H/<sup>1</sup>H) spectrum of compound **5** in CDCl<sub>3</sub> + pyridine-*d*<sub>5</sub>.

Figure S8 - Partial NOESY (<sup>1</sup>H/<sup>1</sup>H) spectrum of compound **5** in CDCl<sub>3</sub> + pyridine-*d*<sub>5</sub>.

Figure S9 – HSQC (<sup>1</sup>H/<sup>13</sup>C) spectrum of compound **5** in CDCl<sub>3</sub> + pyridine-*d*<sub>5</sub>.

Figure S10 - HMBC (<sup>1</sup>H/<sup>13</sup>C) spectrum of compound **5** in CDCl<sub>3</sub> + pyridine-*d*<sub>5</sub>.

## 2. NMR spectra of compound **9**

Figure S11 -  $^1\text{H}$  NMR spectrum of compound **9** in  $\text{CD}_3\text{COCD}_3$ .

Figure S12 –  $^1\text{H}$  NMR spectrum of compound **9** at 10 °C in  $\text{CD}_3\text{COCD}_3$ .

Figure S13 –  $^{13}\text{C}$  NMR spectrum of compound **9** in  $\text{CD}_3\text{COCD}_3$

Figure S14 – HSQC ( $^1\text{H}/^{13}\text{C}$ ) spectrum of compound **9** in  $\text{CD}_3\text{COCD}_3$ .

Figure S15 – HMBC ( $^1\text{H}/^{13}\text{C}$ ) spectrum of compound **9** in  $\text{CD}_3\text{COCD}_3$ .

## 3. Mass Spectra of compound **9**

Figure S16 – Mass spectrum of compound **9** in the range of  $m/z$  740-1000

Figure S17 – Product-ion spectrum of compound **9**

Figure S18 – HRMS-ESI(+) spectrum of compound **9**

## 4. Enthalpy PM7 semi-empirical calculations

Table S1 – Calculations of the formation enthalpies for precursor **8**

Table S2 – Structures and calculations of formation enthalpies for compound **9** tautomers (**9T1**, **9T2** and **9T3**) and structure for tautomer **9T1** optimized with MOPAC2016.

## 5. Spectrophotometric interactions

Figure S19 – Absorption spectra of behaviour of corroles **8** and **9** in the presence of (A) tetrabutylammonium fluoride (TBAF) and (B) acetic acid (AcOH) and AcOH plus triethylamine (TEA).

# 1. NMR spectra of compound 4 and compound 5

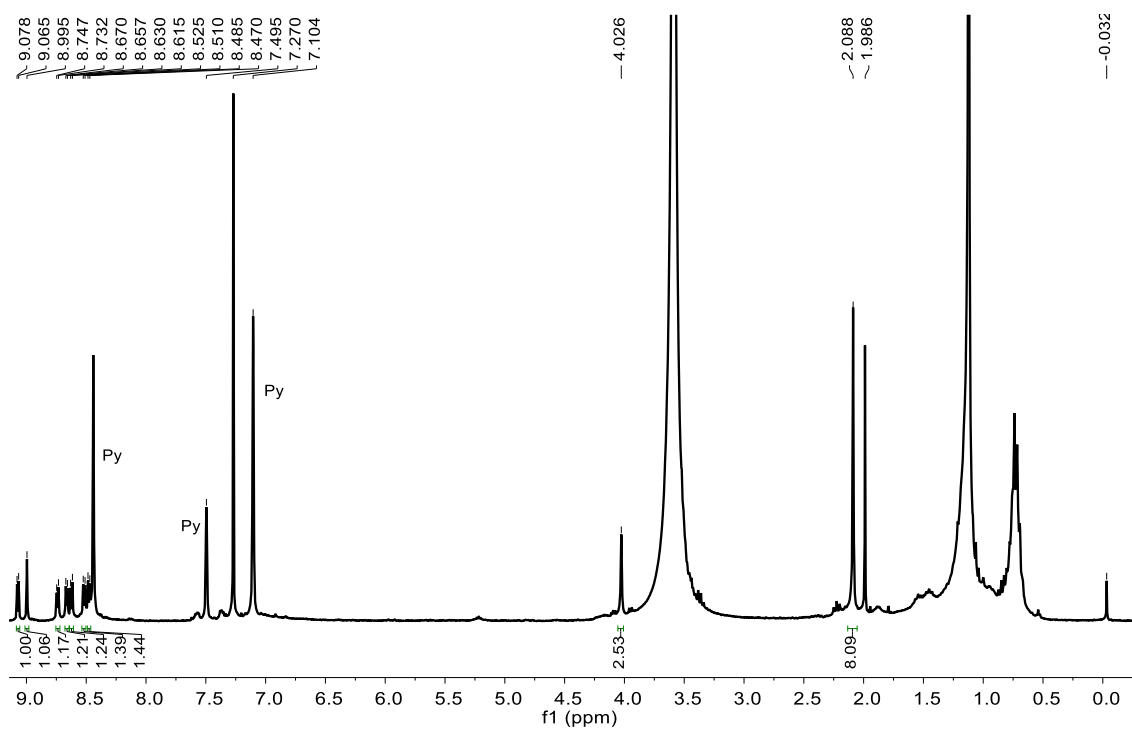

Figure S1 -  $^1\text{H}$  NMR spectrum of compound 4 in  $\text{CDCl}_3$  + pyridine- $d_5$ .

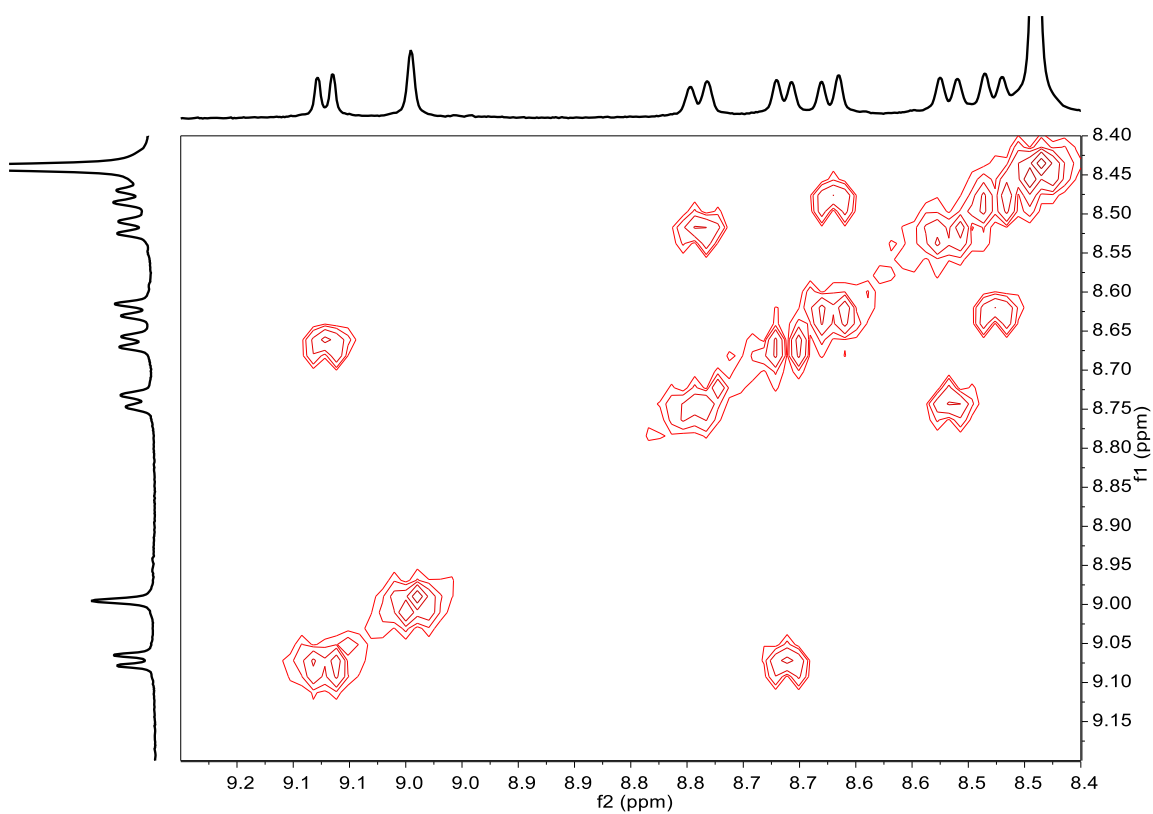

Figure S2 – Partial COSY ( $^1\text{H}/^1\text{H}$ ) spectrum of compound 4 in  $\text{CDCl}_3$  + pyridine- $d_5$ .

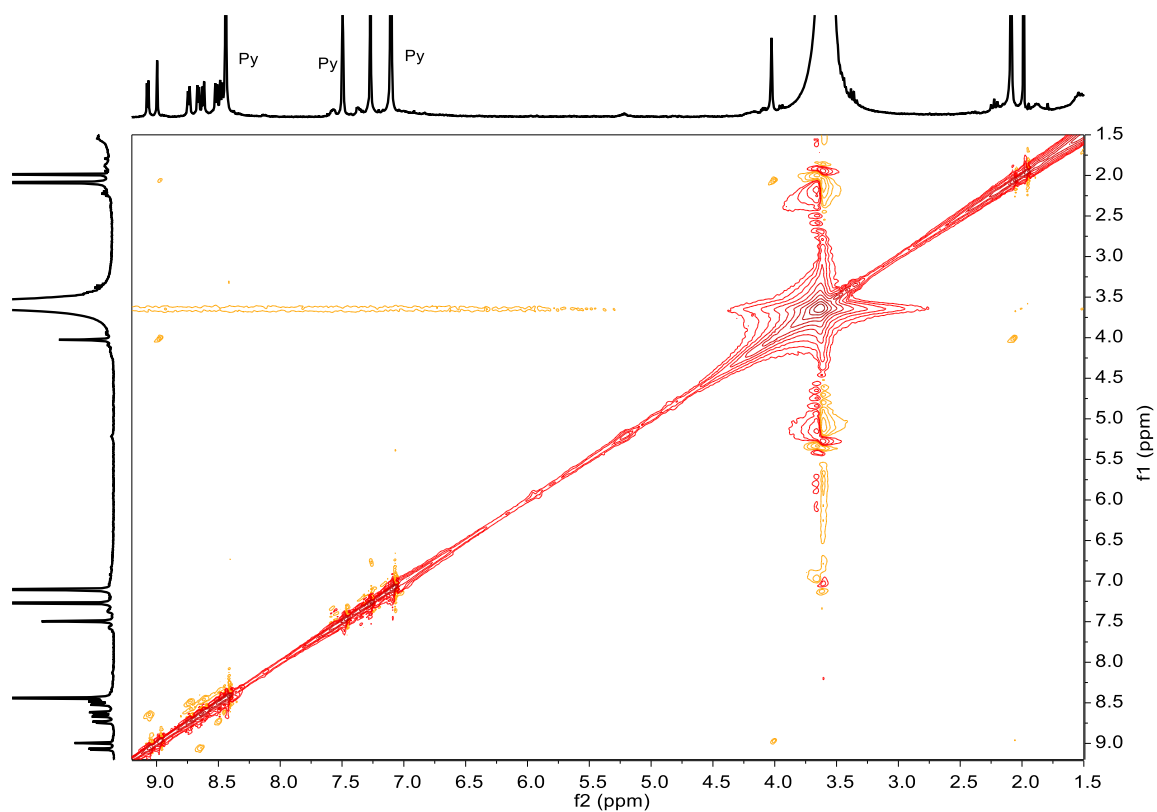

Figure S3 – NOESY ( $^1\text{H}/^1\text{H}$ ) spectrum of compound **4** in  $\text{CDCl}_3$  + pyridine- $d_5$ .

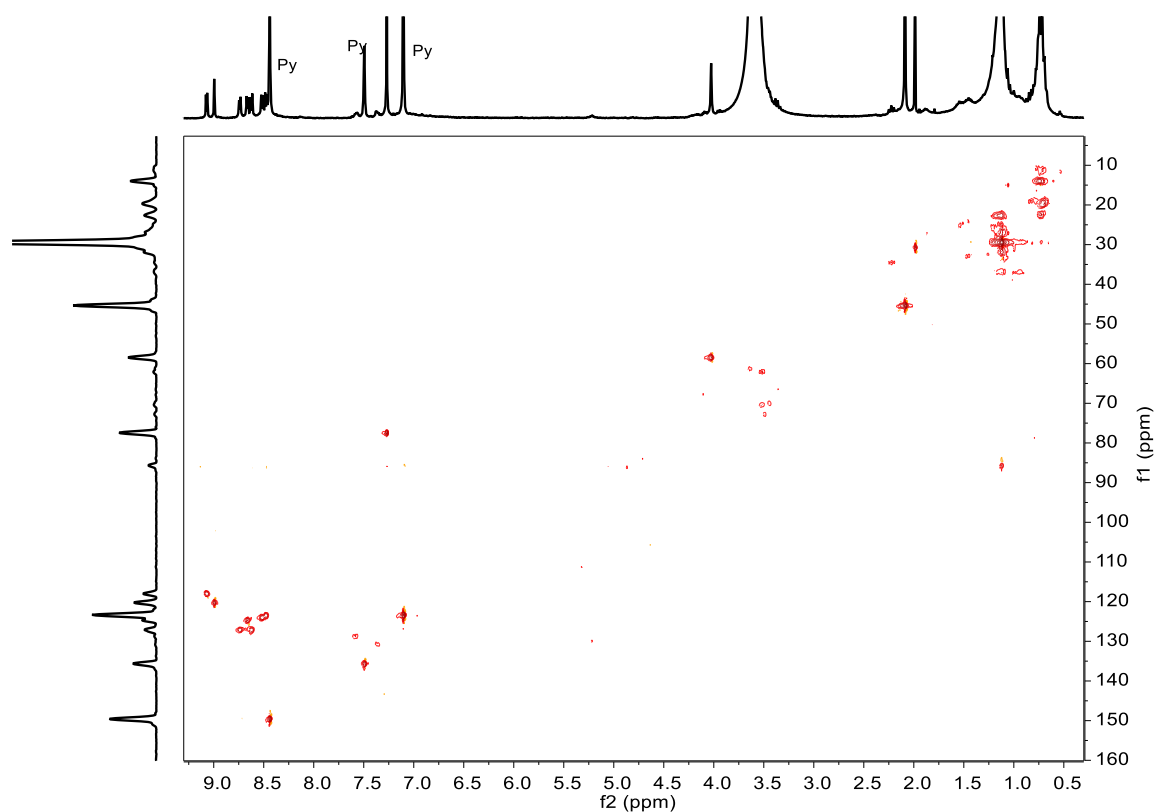

Figure S4 – HSQC ( $^1\text{H}/^{13}\text{C}$ ) spectrum of compound **4** in  $\text{CDCl}_3$  + pyridine- $d_5$ .

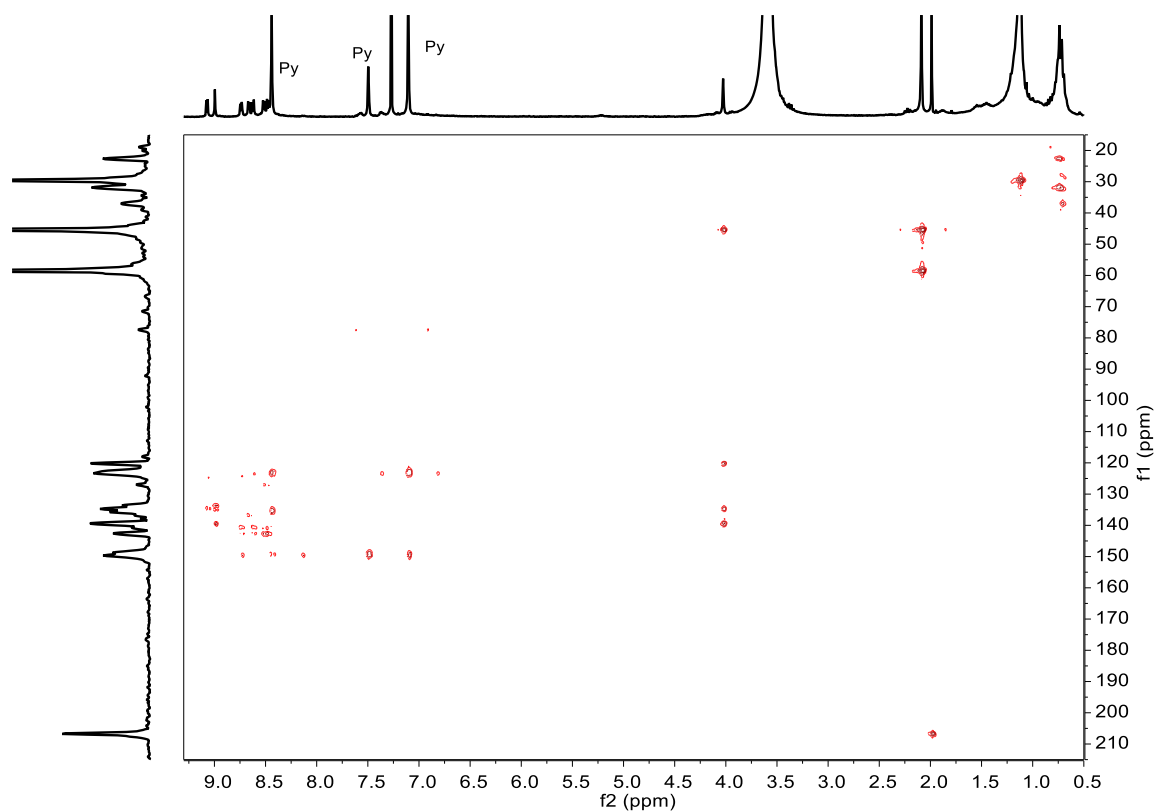

Figure S5 - HMBC ( $^1\text{H}/^{13}\text{C}$ ) spectrum of compound **4** in  $\text{CDCl}_3$  + pyridine- $d_5$ .

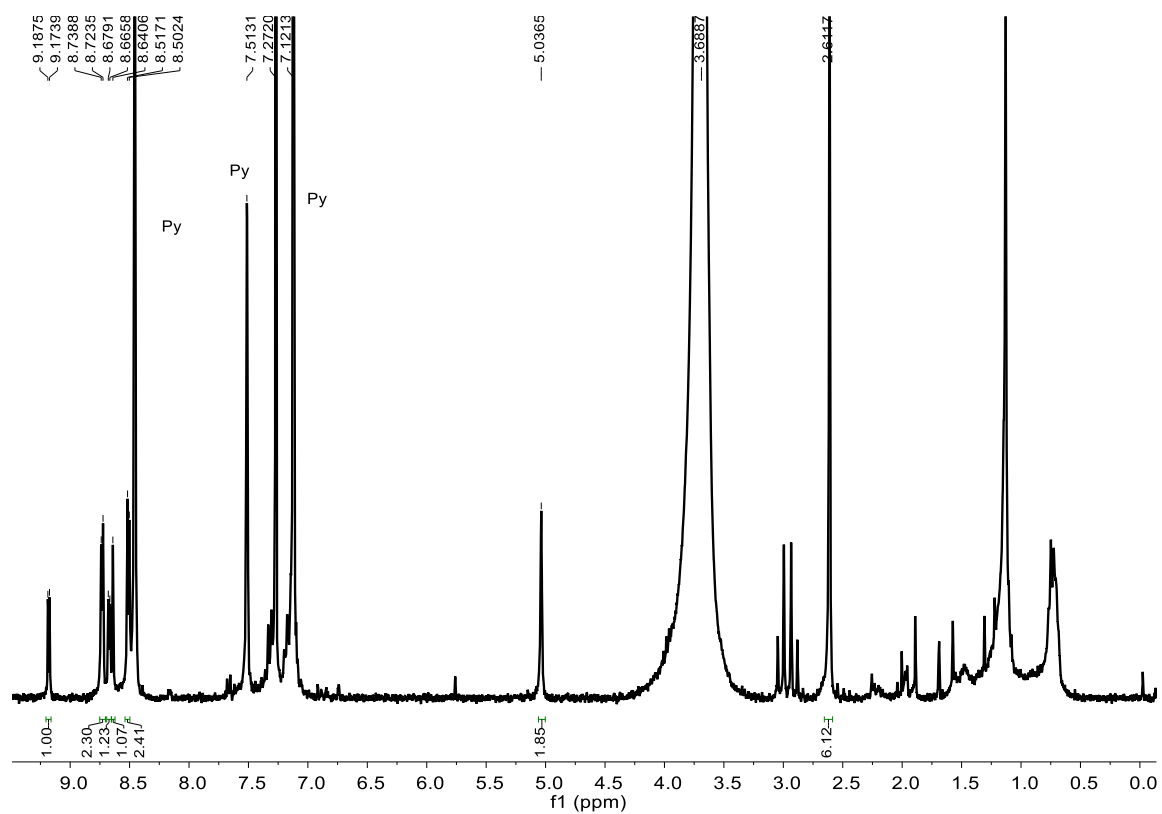

Figure S6 -  $^1\text{H}$  NMR spectrum of compound **5** in  $\text{CDCl}_3$  + pyridine- $d_5$ .

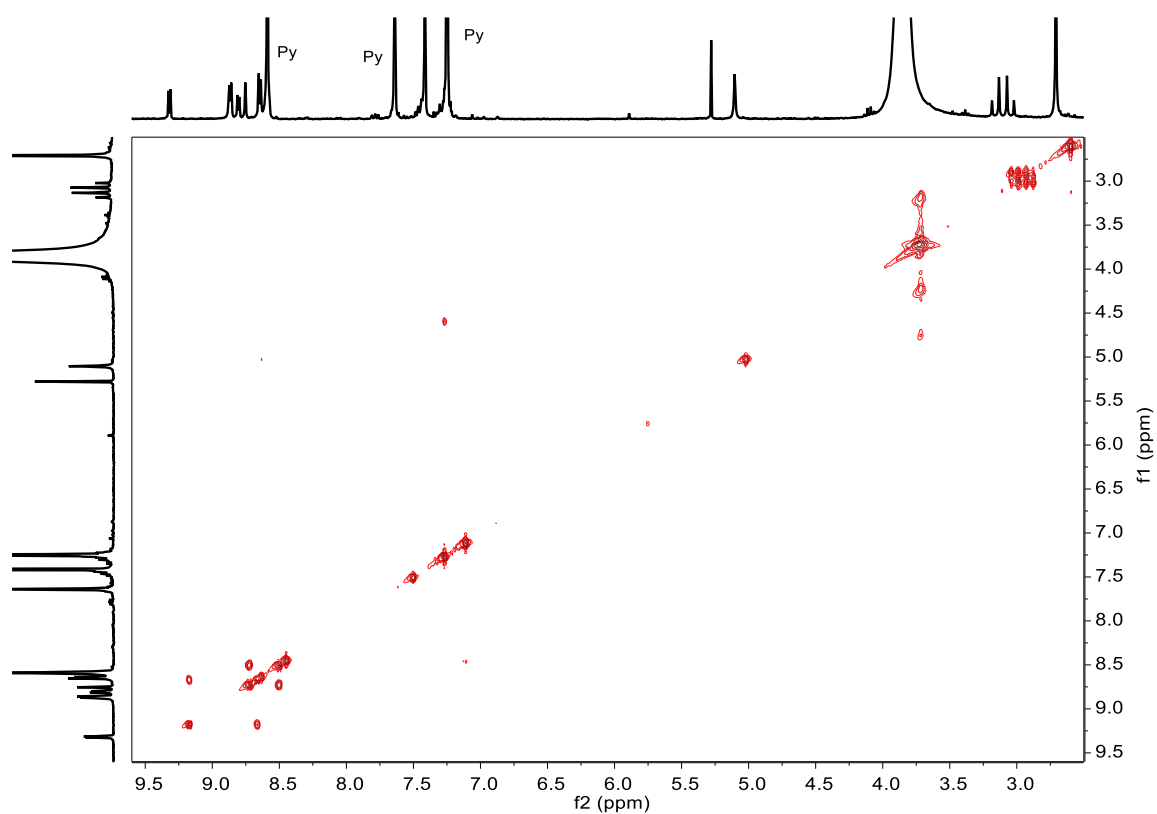

Figure S7 – Partial COSY ( $^1\text{H}/^1\text{H}$ ) spectrum of compound **5** in  $\text{CDCl}_3$  + pyridine- $d_5$ .

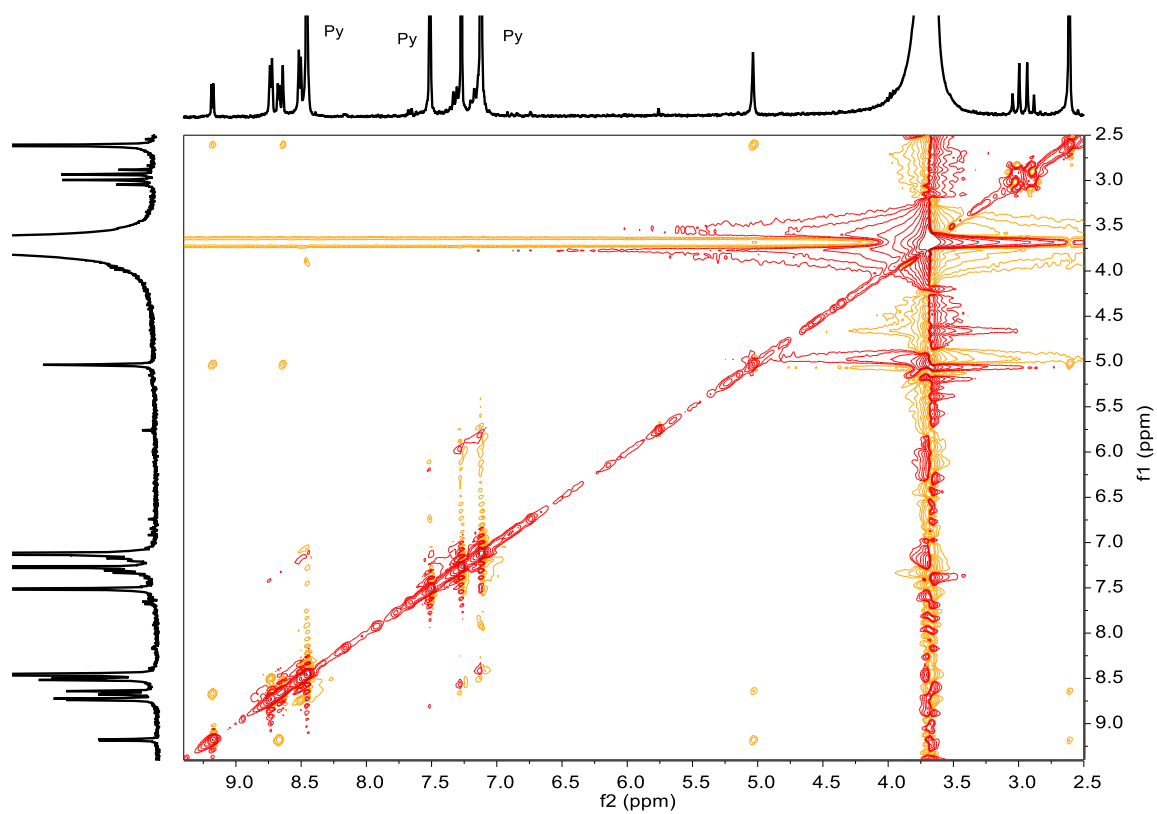

Figure S8 - Partial NOESY ( $^1\text{H}/^1\text{H}$ ) spectrum of compound **5** in  $\text{CDCl}_3$  + pyridine- $d_5$ .

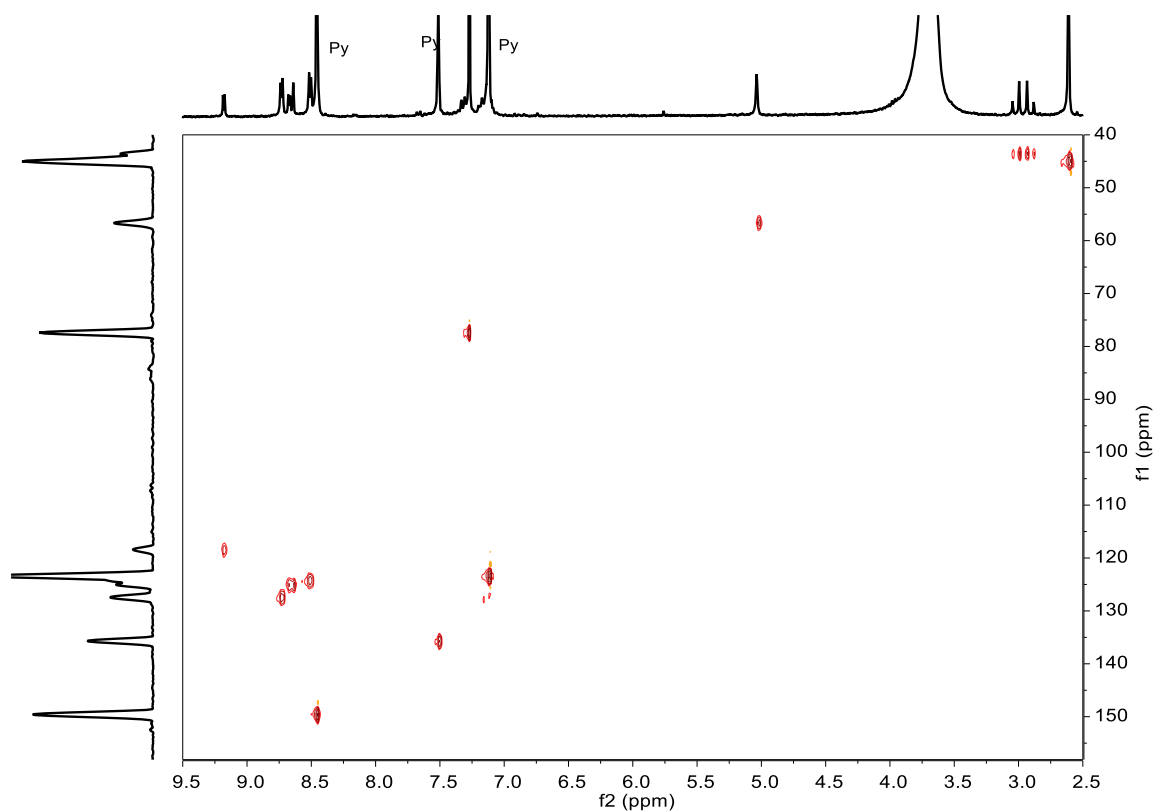

Figure S9 – HSQC ( $^1\text{H}/^{13}\text{C}$ ) spectrum of compound **5** in  $\text{CDCl}_3$  + pyridine- $d_5$ .

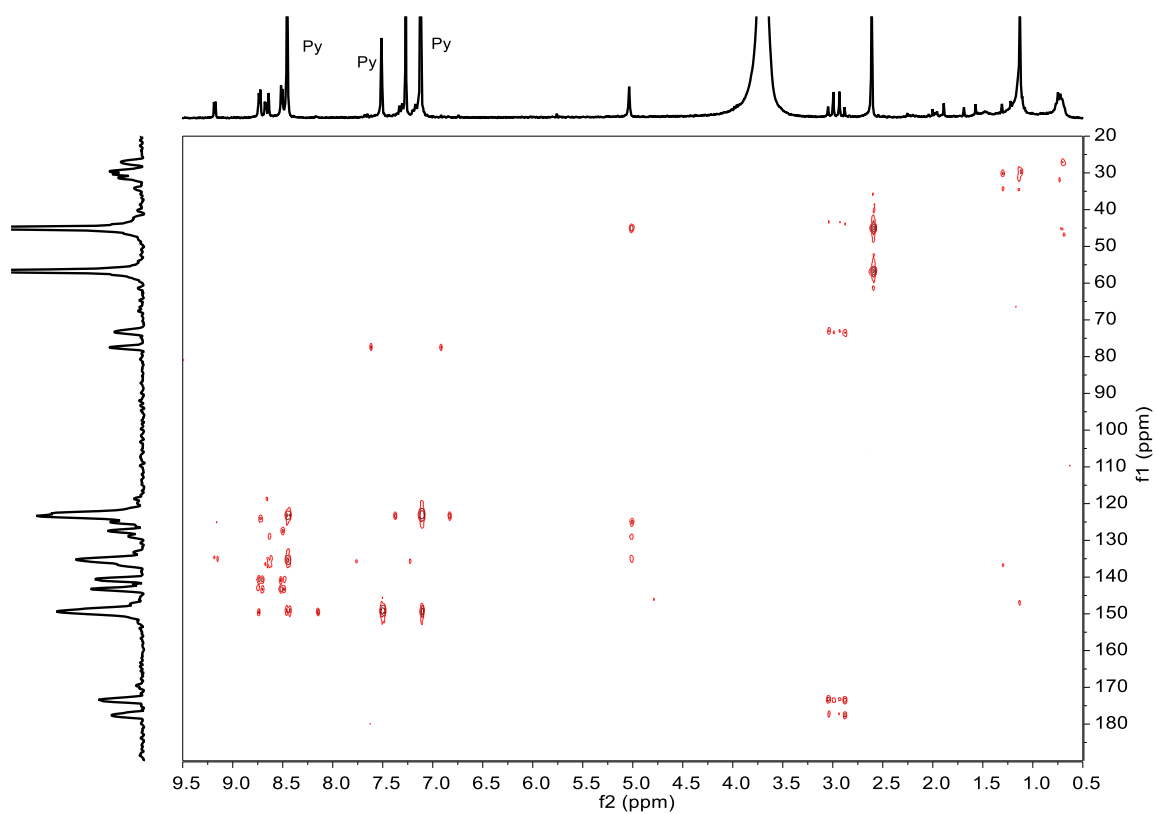

Figure S10 - HMBC ( $^1\text{H}/^{13}\text{C}$ ) spectrum of compound **5** in  $\text{CDCl}_3$  + pyridine- $d_5$ .

## 2. NMR spectra of compound **9**

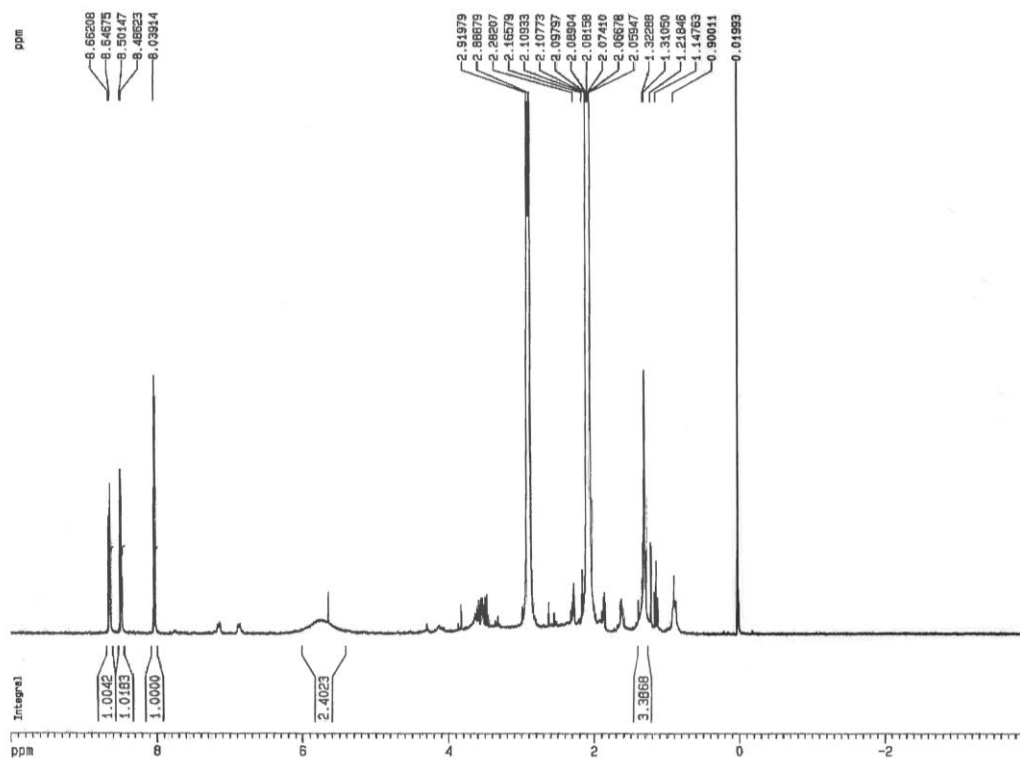

Figure S11 -  $^1\text{H}$  NMR spectrum of compound **9** in  $\text{CD}_3\text{COCD}_3$ .

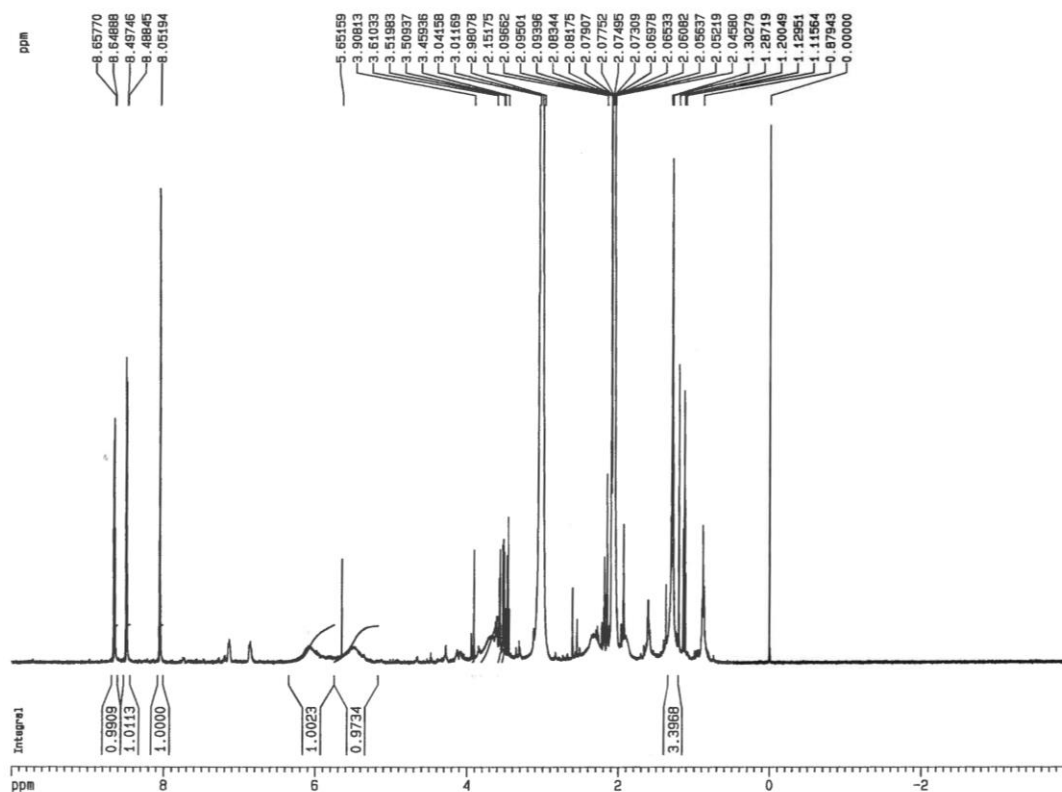

Figure S12 –  $^1\text{H}$  NMR spectrum of compound **9** at 10 °C in  $\text{CD}_3\text{COCD}_3$ .



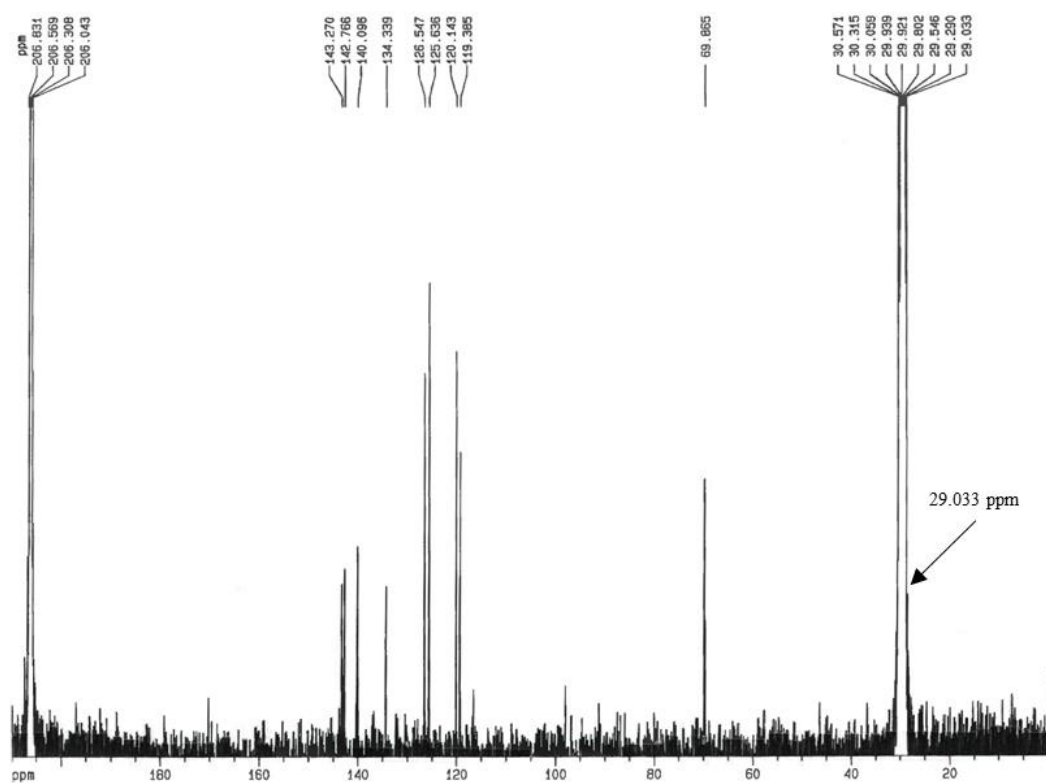

Figure S13 –  $^{13}\text{C}$  NMR spectrum of compound **9** in  $\text{CD}_3\text{COCD}_3$ .

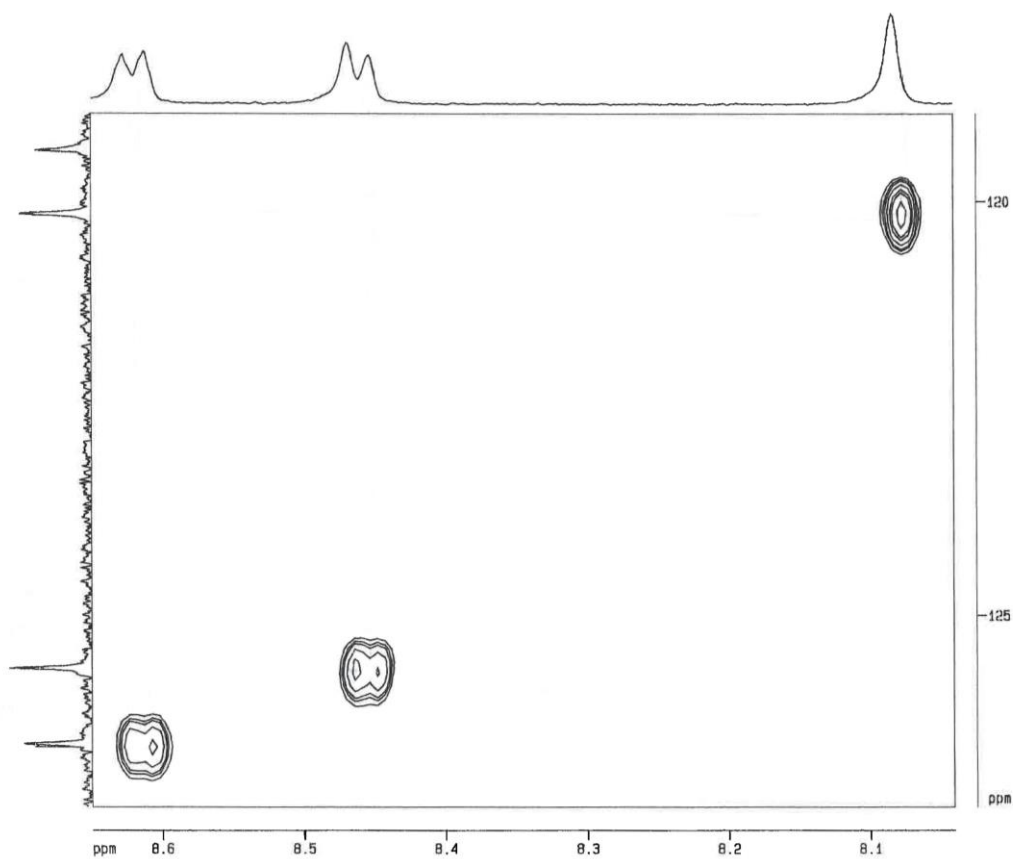

Figure S14 – HSQC ( $^1\text{H}/^{13}\text{C}$ ) spectrum of compound **9** in  $\text{CD}_3\text{COCD}_3$ .

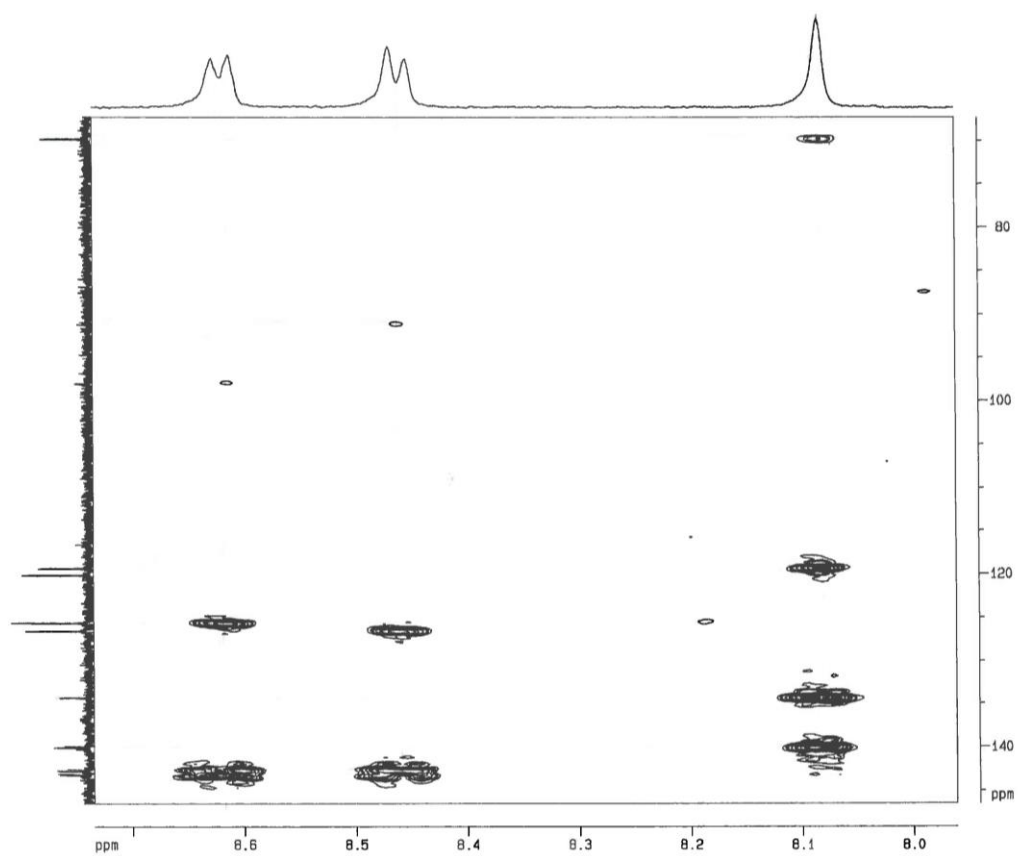

Figure S15– HMBC ( $^1\text{H}/^{13}\text{C}$ ) spectrum of compound **9** in  $\text{CD}_3\text{COCD}_3$ .

### 3. Mass Spectra of compound 9

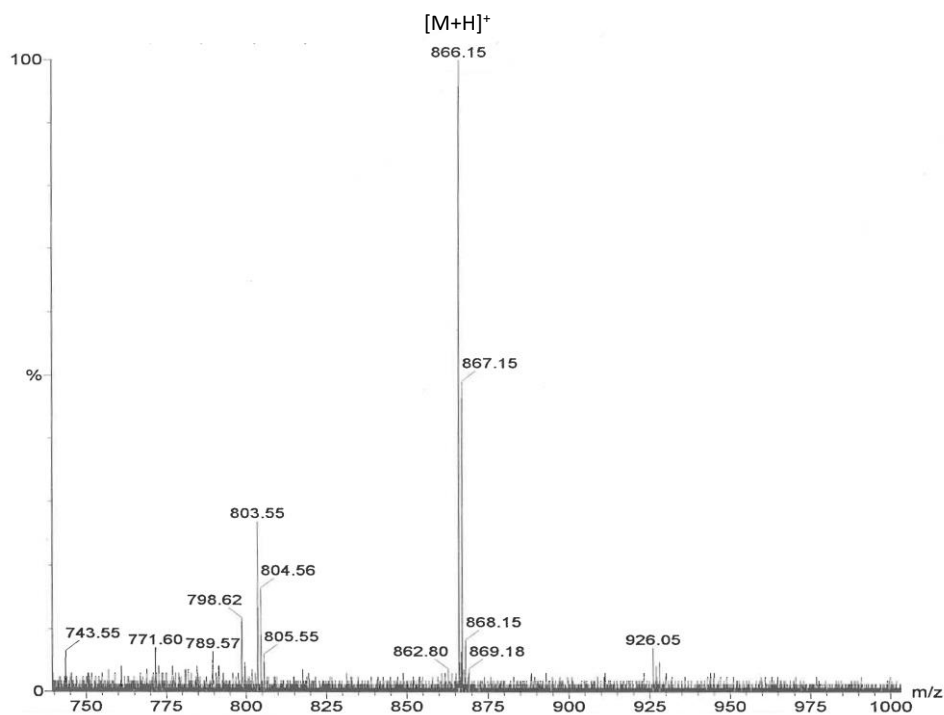

Figure S16 – Mass spectrum of compound 9 in the range of m/z 740-1000

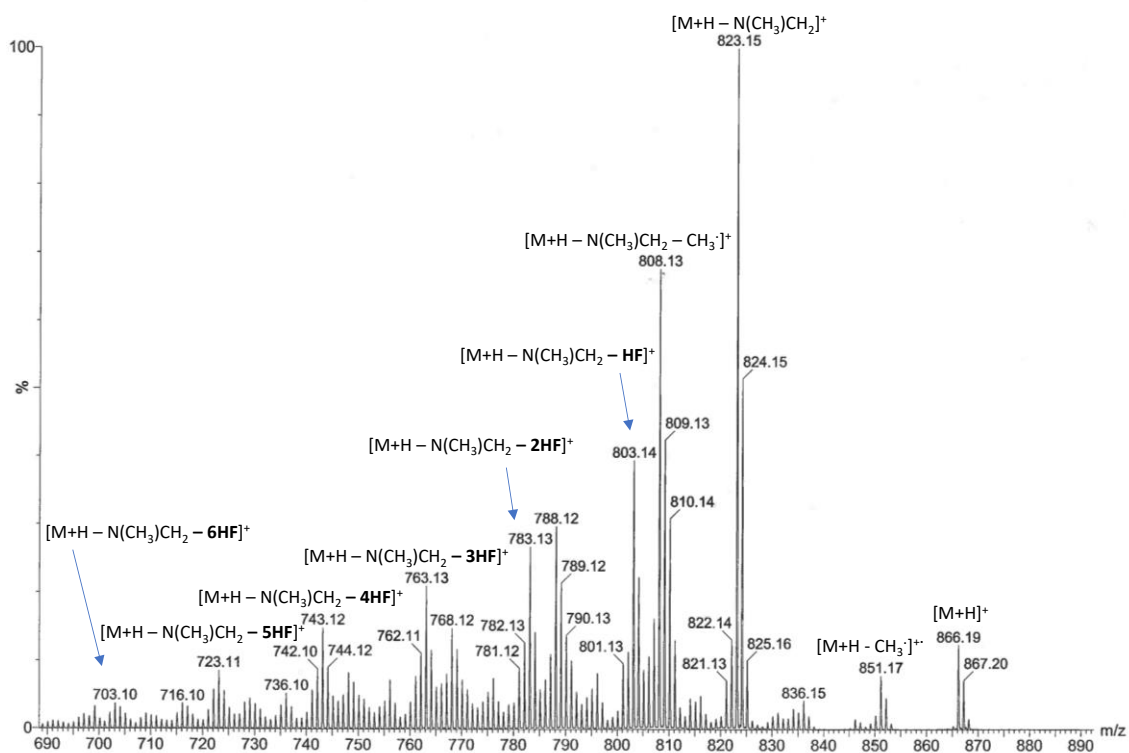

Figure S17 – Product-ion spectrum of compound 9

Acquisition Parameter  
Capillary Exit voltage for ESI 300.000000 V

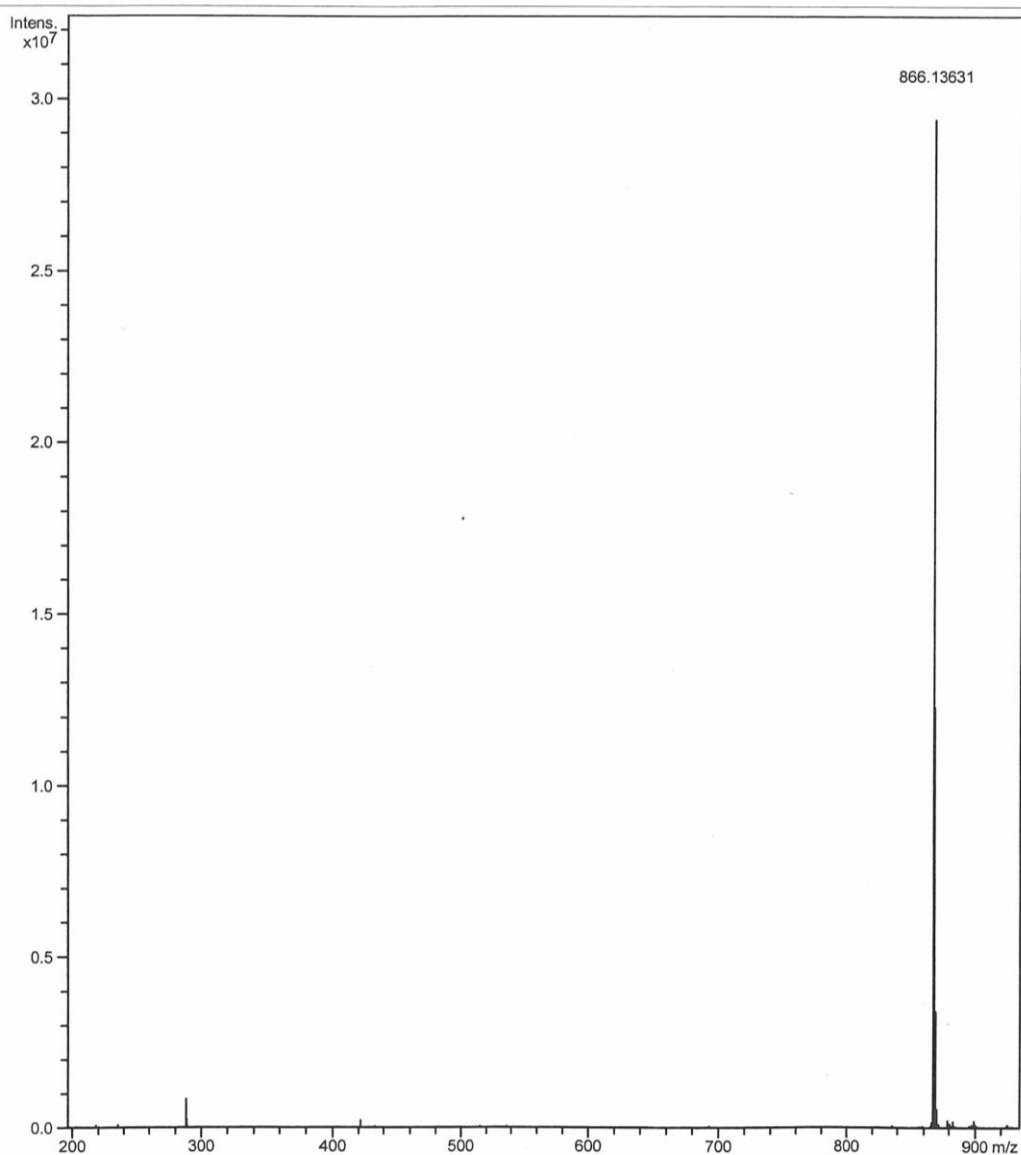

### Mass Spectrum Molecular Formula Report

| Sum Formula                                                                                   | Sigma | m/z       | Err<br>[ppm] | Mean<br>Err<br>[ppm] | Err<br>[mDa] | rdb   | N<br>Rule | e <sup>-</sup> |
|-----------------------------------------------------------------------------------------------|-------|-----------|--------------|----------------------|--------------|-------|-----------|----------------|
| C <sub>41</sub> H <sub>19</sub> F <sub>15</sub> N <sub>5</sub>                                | 0.031 | 866.13955 | 3.74         | 3.21                 | 3.24         | 27.50 | ok        | even           |
| C <sub>46</sub> H <sub>21</sub> F <sub>9</sub> N <sub>3</sub> O <sub>5</sub>                  | 0.056 | 866.13320 | -3.59        | -3.99                | -3.11        | 33.50 | ok        | even           |
| C <sub>49</sub> H <sub>20</sub> F <sub>8</sub> N <sub>3</sub> O <sub>4</sub>                  | 0.074 | 866.13206 | -4.91        | -5.25                | -4.25        | 37.50 | ok        | even           |
| C <sub>49</sub> H <sub>18</sub> F <sub>10</sub> N <sub>5</sub>                                | 0.075 | 866.13970 | 3.92         | 3.29                 | 3.40         | 38.50 | ok        | even           |
| C <sub>40</sub> H <sub>28</sub> F <sub>13</sub> Ga <sub>1</sub> N <sub>3</sub>                | 0.294 | 866.13260 | -4.28        | -5.29                | -3.71        | 22.50 | ok        | even           |
| C <sub>42</sub> H <sub>29</sub> F <sub>10</sub> Ga <sub>1</sub> N <sub>3</sub> O <sub>2</sub> | 0.303 | 866.13504 | -1.46        | -2.46                | -1.27        | 25.50 | ok        | even           |
| C <sub>42</sub> H <sub>29</sub> F <sub>6</sub> Ga <sub>1</sub> N <sub>5</sub> O <sub>5</sub>  | 0.310 | 866.13232 | -4.60        | -5.63                | -3.99        | 28.50 | ok        | even           |
| C <sub>44</sub> H <sub>30</sub> F <sub>7</sub> Ga <sub>1</sub> N <sub>3</sub> O <sub>4</sub>  | 0.314 | 866.13749 | 1.36         | 0.37                 | 1.18         | 28.50 | ok        | even           |
| C <sub>45</sub> H <sub>28</sub> F <sub>9</sub> Ga <sub>1</sub> N <sub>3</sub> O <sub>1</sub>  | 0.314 | 866.13390 | -2.78        | -3.77                | -2.41        | 29.50 | ok        | even           |
| C <sub>47</sub> H <sub>29</sub> F <sub>6</sub> Ga <sub>1</sub> N <sub>3</sub> O <sub>3</sub>  | 0.325 | 866.13634 | 0.04         | -0.93                | 0.04         | 32.50 | ok        | even           |
| C <sub>48</sub> H <sub>27</sub> F <sub>8</sub> Ga <sub>1</sub> N <sub>3</sub>                 | 0.326 | 866.13276 | -4.10        | -5.07                | -3.55        | 33.50 | ok        | even           |
| C <sub>49</sub> H <sub>30</sub> F <sub>3</sub> Ga <sub>1</sub> N <sub>3</sub> O <sub>5</sub>  | 0.337 | 866.13879 | 2.86         | 1.90                 | 2.48         | 35.50 | ok        | even           |
| C <sub>50</sub> H <sub>28</sub> F <sub>5</sub> Ga <sub>1</sub> N <sub>3</sub> O <sub>2</sub>  | 0.338 | 866.13520 | -1.28        | -2.24                | -1.11        | 36.50 | ok        | even           |
| C <sub>50</sub> H <sub>28</sub> F <sub>16</sub> Ga <sub>1</sub> N <sub>5</sub> O <sub>5</sub> | 0.345 | 866.13248 | -4.42        | -5.40                | -3.83        | 39.50 | ok        | even           |

Figure S18 – HRMS-ESI(+) spectrum of compound 9

#### 4. Enthalpy PM7 semi-empirical calculations

Table S1 – Calculations of the formation enthalpies for precursor **8**.

| Compounds | Formation enthalpy<br>(kcal mol <sup>-1</sup> ) <sup>a)</sup> | Formation enthalpy<br>(kcal mol <sup>-1</sup> ) <sup>b)</sup> |
|-----------|---------------------------------------------------------------|---------------------------------------------------------------|
| <b>8</b>  | -416.69                                                       | -421.36                                                       |

<sup>a)</sup> Without solvent. <sup>b)</sup> in toluene.

Table S2 – Structures and calculations of formation enthalpies for compound **9** tautomers (**9T1**, **9T2** and **9T3**) and structure for tautomer **9T1** optimized with MOPAC2016.

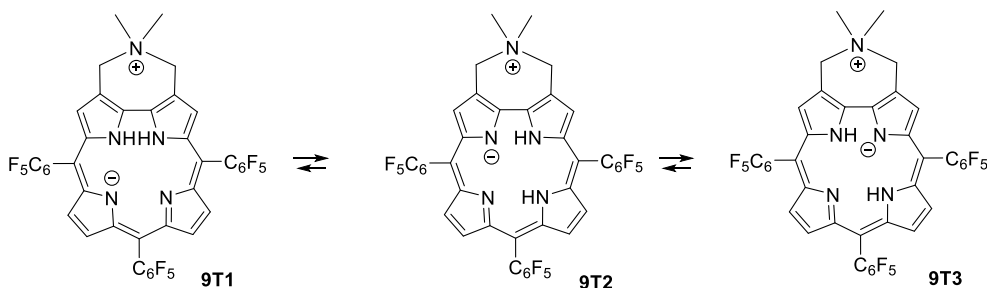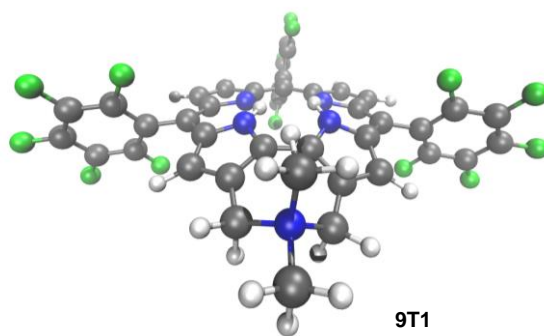

| Compounds  | Formation enthalpy<br>(kcal mol <sup>-1</sup> ) <sup>a)</sup> | Formation enthalpy<br>(kcal mol <sup>-1</sup> ) <sup>b)</sup> |
|------------|---------------------------------------------------------------|---------------------------------------------------------------|
| <b>9T1</b> | -366.54                                                       | -380.95                                                       |
| <b>9T2</b> | -354.94                                                       | -367.21                                                       |
| <b>9T3</b> | -361.04                                                       | -374.73                                                       |

<sup>a)</sup> Without solvent. <sup>b)</sup> in toluene.

## 5. Spectrophotometric interactions

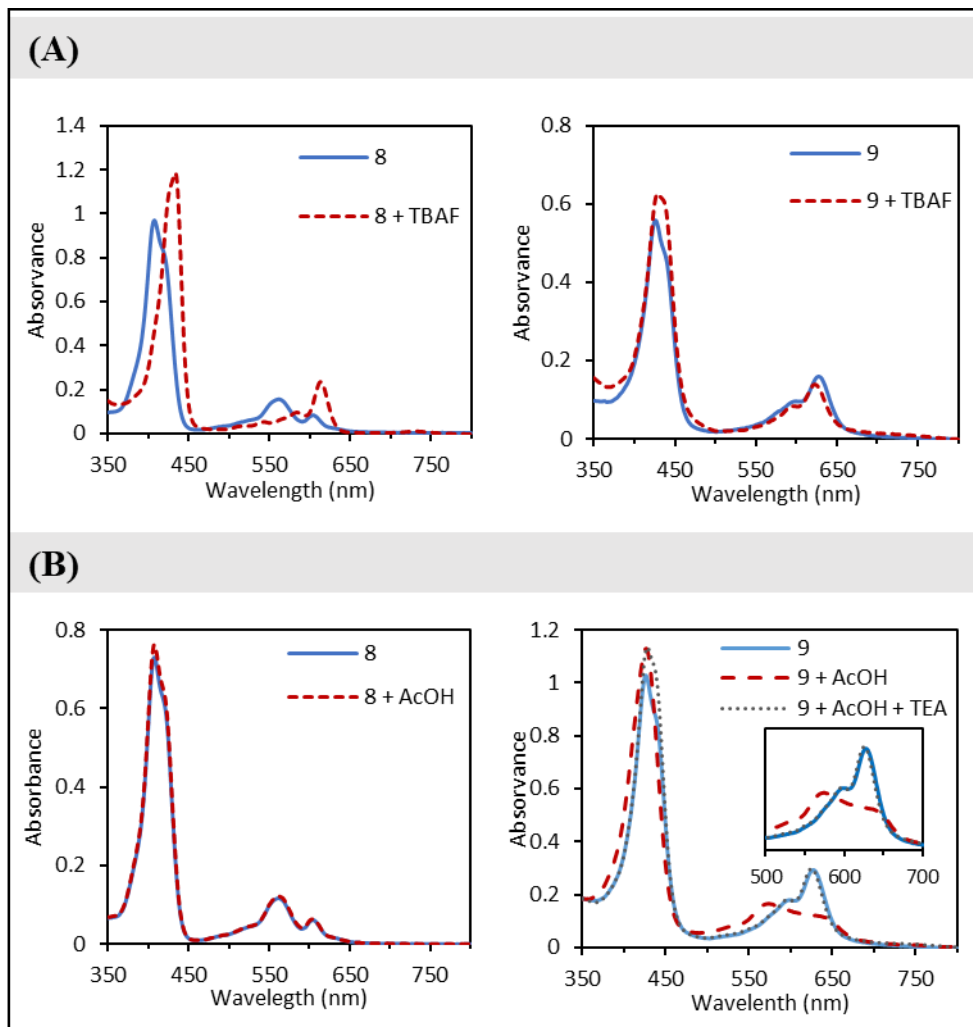

Figure S19 – Absorption spectra of behaviour of corroles **8** and **9** in the presence of (A) tetrabutylammonium fluoride (TBAF) and (B) acetic acid (AcOH) and AcOH plus triethylamine (TEA).
